## RESEARCH ARTICLE

# Socioeconomic and demographic risk factors of autism spectrum disorder among children and adolescents in Bangladesh: Evidence from a cross-sectional study in 2022

Mohammad Omar Faruk<sup>1\*</sup>, Md. Sahidur Rahman<sup>2,3</sup>, Md. Shohel Rana<sup>1</sup>, Shohel Mahmud<sup>1</sup>, Mahmuda Al-Neyma<sup>1</sup>, Md. Sazzadul Karim<sup>1</sup>, Nazia Alam<sup>1</sup>

**1** Department of Statistics, Noakhali Science and Technology University, Noakhali, Bangladesh, **2** One Health Center for Research and Action, Chattogram, Bangladesh, **3** FETPV Technical Officer, Eastern Mediterranean Public Health Network (GHD|EMPHNET), Bangladesh Country Office, Dhaka, Bangladesh

\* [omarfaruk.stat@nstu.edu.bd](mailto:omarfaruk.stat@nstu.edu.bd)

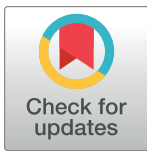

## OPEN ACCESS

**Citation:** Faruk MO, Rahman M.S, Rana M.S, Mahmud S, Al-Neyma M, Karim M.S, et al. (2023) Socioeconomic and demographic risk factors of autism spectrum disorder among children and adolescents in Bangladesh: Evidence from a cross-sectional study in 2022. PLoS ONE 18(8): e0289220. <https://doi.org/10.1371/journal.pone.0289220>

**Editor:** Ghada Abdrabo Abdellatif Elshaarawy, National Research Centre, EGYPT

**Received:** November 25, 2022

**Accepted:** July 13, 2023

**Published:** August 4, 2023

**Copyright:** © 2023 Faruk et al. This is an open access article distributed under the terms of the [Creative Commons Attribution License](https://creativecommons.org/licenses/by/4.0/), which permits unrestricted use, distribution, and reproduction in any medium, provided the original author and source are credited.

**Data Availability Statement:** Data can be found online at: <https://www.kaggle.com/datasets/faruk268/determinants-of-autism-spectrum-disorder/settings>.

**Funding:** This study is funded by Noakhali Science and Technology University Research Cell (NSTURC), and the funding number was: NSTU/RC/SS-05/T-22/77. The funders had no role in study design, data collection and analysis, decision

## Abstract

Autism spectrum disorder (ASD) is the assorted uneven conditions of the human brain that lead to developmental disabilities. This cross-sectional study aimed to identify the substantial risk factors of ASD among children in Bangladesh. The data were collected using convenience sampling through a questionnaire filled up by the trained interviewers. Mann-Whitney U and Kruskal-Wallis H tests were applied as bivariate analysis, and generalized beta regression was performed to determine the significant risk factors of autism spectrum disorder. The odds ratio (OR) along with 95% confidence interval (CI) were the measuring parameters of the risk factors of ASD. The result revealed that later birth order children have more risk of ASD (OR = 1.13, CI: 1.014–1.264,  $p = 0.027$ ) compared to the children whose birth order is first. Premature birth of the child (OR: 0.87, CI: 0.76–1.00,  $p = 0.05$ ) and father's age (OR: 0.86, CI: 0.76–0.97,  $p = 0.020$ ) substantially affects ASD. The maternal history of specific illness (diabetes, thyroiditis, and hypertension) during pregnancy also significantly affect ASD (OR: 1.34, CI: 1.14–1.61,  $p = 0.002$ ). The results of this study would assist policymakers in taking necessary steps to reduce the incidence of this disorder by targeting the potential risk factors.

## Introduction

A neurological illness called autism spectrum disorder (ASD) impacts a child's ability to interact, communicate, and learn [1]. An ASD patient deals with various difficulties, including sensory issues, movement impairments, learning disabilities, and mental health issues like anxiety and sadness [2]. While some people with this illness can live independently, others need care and support for the rest of their lives [3]. The prevalence of ASD has dramatically increased over the past ten years [4]. Around 52 million individuals worldwide are affected by autism to various degrees [5]. The Centers for Disease Control and Prevention (CDC) estimates that one

to publish, or preparation of the manuscript. We have no conflicts of interest to disclose.

**Competing interests:** The authors have declared that no competing interests exist.

in 44 youngsters has an ASD diagnosis, and all socioeconomic, racial, and ethnic groups can be affected by this disorder [6]. According to World Health Organization (WHO), about one out of every 100 children has ASD [7]. Recent epidemiological studies have revealed a sharp rise in the frequency of ASD, with a prevalence of four to five times higher in boys than in girls [6]. According to estimates, 1% of people in Asia, Europe, and North America have autism spectrum disorder [8, 9].

The prevalence of autism is expected to be underreported, but a serious health issue in Bangladesh [10]. Bangabandhu Sheikh Mujib Medical University (BSMMU) estimated that almost 2 in 1000 children have ASD in Bangladesh [11]. A study conducted in 2016 by the Bangladesh Ministry of Social Welfare discovered that 19% of all neurological disorders reported included autism [10]. One study recently found that the prevalence of ASD was 7.5 per 10,000 children in a rural Bangladeshi sub-district, suggesting that the prevalence of ASD in Bangladesh may be higher than previously thought [12].

ASD is linked to significant stress, worry, and loneliness in the patient's caregivers [13]. Parental socioeconomic and cultural history plays a substantial role in developing ASD. Maternal nutrient intake and food supplements significantly impact ASD [14]. Parents with poor economic status have poor nutrition and, as a result, can have poor health for their newborn child [15]. Literature also evident that older-aged parents may have a greater risk of having a child with ASD [16]. Gestational respiratory infection, pre-term birth, and hypoxia during childbirth were the significant risk factors for ASD [17]. Gender of the child, low birth weight, urban residence, and neonatal jaundice substantially impact ASD [18]. For any prevention or control tactics to succeed, it is essential to identify the risk factors and make parents aware not to have such unexpected conditions. However, the literature revealed a scarcity of information on the risk factors of ASD in Bangladesh. Moreover, most of the studies were hospital-based investigations. Therefore, we devise a cross-sectional study throughout the central and south-eastern parts of the country to investigate the potential causes of ASD among children in Bangladesh. More specifically, this study aimed to determine the neonatal, parental, and socioeconomic, risk factors of ASD.

## Methodology

### Study design

This cross-sectional study aims to assess the risk factors that significantly cause ASD among children aged 2 to 18 years in Bangladesh. Data were collected from 22 autism schools in three cities—Dhaka, Chittagong and Comilla. Dhaka is the capital city, and Chittagong is the country's main port city. The density and number of people living in these areas are high [19], and most autism schools are also situated there (67.61%). Comilla is another city under the Chattogram division located between Dhaka and Chittagong. Therefore, this study selected these three cities. Among the selected schools, 21 were categorized as Special Educational Needs schools, while one was a mainstream school. All the schools were mixed-sex, and their student populations ranged from 15 to 150 pupils. The majority of schools (13 out of 22) were located in Dhaka, 5 schools in Chattogram, and 4 schools in Cumilla. Among these schools, 19 were non-governmental organizations, while 3 were government-run. Further details regarding the per-school breakdown can be found in [S1 Appendix](#). The inclusion criterion for this study was autistic child aged between 2–18, and whose parents were present at the school on visiting day and gave verbal consent for the child to participate. Most of the questions were related to parents' and children's health conditions before and during the birth of the ASD child. Therefore, we have taken consent and interview from parents only. Children absent in school or not given consent by parents were considered exclusion criteria of this study. Parents willing to

participate in the study but unable to respond to the questionnaire due to memory lapse and limited knowledge were also excluded from the survey.

### Data collection tool

After carefully revising the previous literature, the authors prepared the questionnaire for this study. The preliminary questionnaire contained 40 questions and validated the consistency through a small-scale pilot survey. Finally, a set of 36 questions was finalized for data collection. The details of the literature reviewed for constructing the questionnaire can be found in [S2 Appendix](#). The questionnaire included information on parents' health status during pregnancy and complications of the child during and after birth, like asphyxia, premature birth, etc. Trained interviewers collected the responses by direct interview method from the parents. The responses related to ASD were based on parents' observations of their children. The answers for some of the independent variables were collected based on the previous health report prepared by gynaecologists and/or paediatricians. The questionnaire was designed in three major sections. The first section included neonatal information like the age of the children (number), gender (Male, Female), Birth weight (<2.5 kg,  $\geq$  2.5 kg), Birth order (First-born, Later born), Premature birth (No, Yes), Birth asphyxia (No, Yes), Breastfeeding (<6 months, 6 to 12 months, >12 months). The second section contains information on parental socio-demographic characteristics and health status. The variables included in the second section were Father's age at the time of delivery (<40 years,  $\geq$  40 years), Mother's age at the time of birth (<21 years, 21 to 35 years, >35 years), Socioeconomic status (low, middle, high), Father's and Mother's education (Less than secondary level, Secondary level, Higher secondary level, Graduate), Father's occupation (Not employed, Private service, Government service, Teacher), Mother's Occupation (Housewife, Private service, Government service, Teacher), Family types (Joint family, nuclear family), Family history of autism disorder (No, Yes), Father illness (No, Diabetes, Others (arthritis, thyroid problem, etc.)), Consanguinity (Not related, first degree related), Threatened abortion 20 weeks (No, Yes), Specific illness during pregnancy (No, Diabetes, Thyroid, Others), Psychological stress of a mother during pregnancy (No, Yes), Maternal history of specific drug use during pregnancy (No, Yes), Poor nutrition during pregnancy (No, Yes), Vitamin D deficit (No, Yes), Mineral deficiencies (No, Yes), and Type of delivery (Vaginal delivery, Caesarian section). Socioeconomic status was measured by key variables parents' education, parents' occupation, family types (joint/nuclear), present residents, and monthly family income. Monthly family income was expressed in Bangladeshi Taka (BDT) and divided into three categories- 10,000–15,000 BDT, 16,000–40,000 BDT, and >40,000 BDT. Finally, socioeconomic status was categorized into three classes- low, middle, and high, and details of the calculation of socioeconomic status would be found in [S3 Appendix](#). In the mineral deficiency question, we only focused on Zinc deficiency as the literature has proven the role of Zinc in the neurodevelopment of infants. Vaginal delivery refers to the natural delivery of offspring either at home or in any institution without using any instrument in the presence of an expert midwife or health professionals. The information on the psychological stress of mothers during pregnancy was collected based on their self-assessment and the use of antidepressant drugs at that time. In case of threats to abortion, we asked for the history of pressure on mothers from husbands or families to abort the fetus during pregnancy which could severely affect the mother's mental health and the development of the fetus. Poor nutrition of mother's during pregnancy refers to mothers whose pre-pregnancy Body Mass Index score is less than 18.5, and sufficient nutrition refers to a BMI score greater than 18.5. In the third section, 10 Likert scale items were considered to assess the dependent variable (childhood autism

rating score (CARSc)) and discussed in detail in the next section. The study variable considered was the score from 0 to 1 continuous scoring of ASD among Bangladeshi children.

### Assessment of childhood autism rating score (CARSc)

The Childhood Autism Rating Scale (CARS) is a 15-item observational rating scale to distinguish children with ASD [20] precisely. For a study, a licensed clinical psychologist or developmental pediatrician completed the CARS rating scale based on the Autism Diagnostic Observation Schedule (ADOS), parent report, and direct observation of cognitive testing [21]. A study among preschool children in Sharkia, Egypt, used the CARS to identify the risk factors of ASD [22]. The CARS tools were also successfully used in research to measure the prevalence and determinants of ASD [23–26]. The current study considered 10 items (Fig 1) out of 15 from CARS [20], eliminating and modifying some items and their coding. The details of the items removed and modified for this study can be found in S4 Appendix. Each item appeared with 4 levels coded 0, 1, 2, and 3. Where 0 indicates that the child behaves within normal limits, 1 for mildly abnormal behavior, 2 indicates moderately abnormal, and 3 for severely abnormal behavior. The items considered for the CARSc are Imitation, Emotional Response, Visual Response, Listening Response, Taste, smell and touch response, Fear and nervousness, Verbal communication, Activity level, Level of intellectual response, and General Impression. By adding all 10 items, a total autism score (TAS) minimum of 0 and a maximum of 30 can be obtained. The obtained TAS was converted to a score ranging from 0 to 1 by dividing the TAS by 30 for every child. Let  $V_{ij}$  be the value of the  $j_{th}$  category of the  $i_{th}$  item responded by the

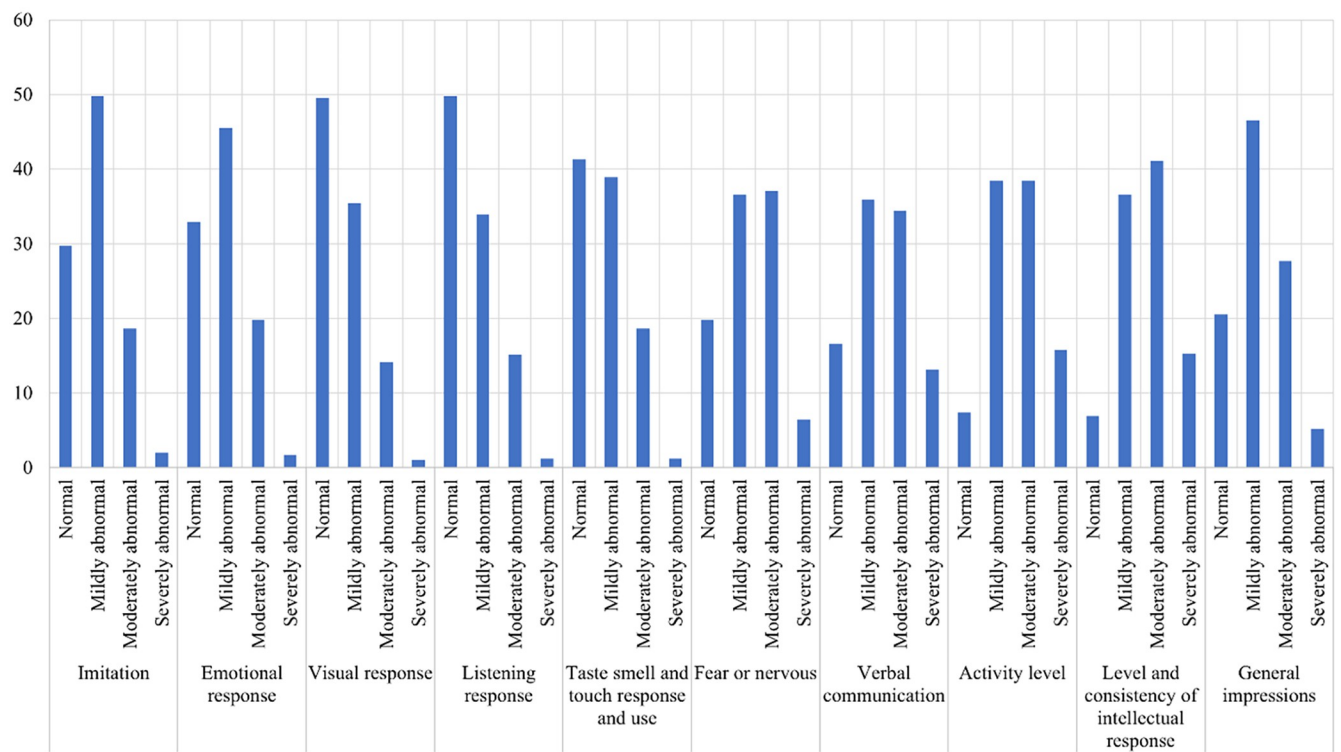

Fig 1. Indicators of autism spectrum disorder.

<https://doi.org/10.1371/journal.pone.0289220.g001>

parent of an autistic child. Now the total autism score (TAS) for that child can be calculated by,

$$TAS = \sum_i \sum_j V_{ij} \tag{1}$$

Where  $i = 1,2,3, \dots \dots \dots 10$  and  $j = V = 0,1,2,3$

Now the childhood autism rating score (CARSc) can be calculated by the formula,

$$CARSc = \frac{TAS}{TAS_{Max}} = \frac{\sum_i \sum_j V_{ij}}{TAS_{Max}} \tag{2}$$

Here  $TAS_{Max}$  can be obtained when  $j = 3$  for all  $i$ .

The range of the CARSc lies between 0 and 1, i.e.,  $0 \leq CARSc \leq 1$ . CARSc will be 0 when  $j = 0$  for all  $i$ , and 1 when  $j = 3$  for all  $i$ .

This score is the Childhood Autism Rating Score (CARSc). The score tending from 0 to 1 indicates that the severity of ASD increased. The details of the calculation of CARSc can be found in [S4 Appendix](#).

**Reliability and validity of CARSc.** A scale will be helpful to a researcher if it measures some phenomenon consistently, i.e. if it is reliable. The reliability coefficient of Cronbach’s Alpha was calculated to measure the internal consistency of CARSc. The alpha value for the scale is 0.68, indicating that CARSc scale is acceptable and reliable enough [27]. The results suggest that this scale finds some unitary, essential features rather than several unrelated behaviours. Two trained psychology graduate students administrated the CARSc to assess interrater reliability. The children with autism were observed by the experimenters and completed the CARSc. Based on the ratings of 36 autistic children, the average interrater reliability obtained is 0.939. The correlation coefficient of the interrater individual items is presented in [Table 1](#). The correlation between the total autism score and individual items score (item-total) was computed as a measure of validity. The correlation coefficients of individual items with the total score were significant ( $p < 0.05$ ), indicating the instrument’s validity. In summary, the measurements mentioned above support the reliability and validity of the CARSc.

### Sampling and data collection

This study used convenience sampling to select autism schools and participants for collecting data on children with ASD. Firstly, three big and busiest cities named: Dhaka, Chittagong, and

**Table 1. Interrater reliability of the individual items of CARSc.**

| Items                                         | $r_1$  |
|-----------------------------------------------|--------|
| Imitation                                     | .793** |
| Emotional Response                            | .860** |
| Visual Response                               | .696** |
| Listening Response                            | .773** |
| Test, Smell, and Touch Response               | .610** |
| Fear and Nervousness                          | .780** |
| Verbal Communication                          | .729** |
| Activity Level                                | .757** |
| Level of Consistency of Intellectual Response | .540** |
| General Impression                            | .853** |

Note:  $r_1$  is the interrater correlation of individual items, \*\* $p < 0.05$

<https://doi.org/10.1371/journal.pone.0289220.t001>

Comilla in Bangladesh, were chosen. By searching on Google Maps, this study found 213 autism schools across the country, among them 144 (67.61%) schools in Dhaka, Chittagong, and Comilla. Written applications were sent for data collection to 30 schools convenient to the authors and actively running during the study period. Permission has been obtained from the authority of 22 institutions for data collection. This research used Cochran's formula for the finite population to determine the required sample size [28]. The Cochran's formula for sample size determination for the finite population is

$$n = \frac{n_0}{1 + \frac{(n_0-1)}{N}} \quad (3)$$

Where  $N$  is the size of the finite population,  $n_0$  is the sample size for an infinite population, and  $n_0$  can be defined as

$$n_0 = \frac{z^2 pq}{e^2} \quad (4)$$

Here,  $z$  is the critical value of expected confidence level,  $p$  is the proportion of a certain attribute presented in the population,  $q = 1 - p$ , and  $e$  is the level of precision. Now if we consider 5% level of significance or 95% confidence interval, we have  $z = 1.96$ , considering the expected proportion of the study's attribute is 50%, i.e.,  $p = 0.5$ ,  $q = 1 - p = 0.5$ , and  $e = 0.05$ . Putting all these values in Eq (4), we can get  $n_0 = 384.16 \approx 384$ . According to Autistic Children's Welfare Foundation, the estimated number of autistic children in Bangladesh is 3,00,000 [29]. Hence, the population size for this study is  $N = 3,00,000$ . Now, using the value of  $N$ , and  $n_0$ , we have from Eq (3)

$$n = \frac{384}{1 + \frac{(384-1)}{300000}} = 383.51 \approx 384 \quad (5)$$

The adequate sample size for this study population is 384, and this investigation targeted 384 children for data collection. However, the study reached 450 parents, considering the possibility of incomplete response, participant withdrawal from the study, etc. Finally, we got complete responses from 404, with a response rate of 89.78%. A group of skilled and trained interviewers collected data through face-to-face interviews with the parents of the autistic child. All the data have been recorded in an Excel sheet and used for further analysis. Data collection took place between June 1, 2022, and July 31, 2022. A detailed illustration of the child with ASD considered in this study has been presented in Fig 1. As the children cannot respond to their physical, mental, socioeconomic, and demographic conditions, the data has been collected from their parents. Furthermore, the parents were informed that completing the questionnaire would take about 5–10 minutes.

### Statistical analysis

The dependent variable constructed in this study is a score variable (CARSc), which ranges from 0 to 1. The increasing value of CARSc from 0 to 1 indicates an increase in the severity of ASD. To test the normality of the outcome variable Kolmogorov-Smirnov and Shapiro-Wilk tests were applied, and the test confirmed the non-normality assumption ( $p < 0.05$ ) of the study variables. First, the frequency distribution of all the explanatory variables (neonatal, parental socioeconomic, and demographic features) has been constructed to understand the general information about the study. Secondly, Mann-Whitney and Kruskal-Wallis H tests have been performed as bivariate analyses. The non-parametric Mann-Whitney test was applied as the outcome variable is non-normal numeric, and the independent variables are

qualitative (2 categories). Similarly, the Kruskal-Wallis H test was also applied in the same situation but when explanatory qualitative variables have 3 or more categories. The variables found significant in the bivariate analysis were further considered in the multivariate analysis. Two generalized linear regression (GLM) models: generalized linear gamma regression (GLGR), and generalized linear beta regression (GLBR) models, have been applied to assess the significant impact of different socioeconomic and demographic variables on ASD. The Akaike information criterion (AIC) has been calculated for both models to identify the best one. The AIC value for the GLBR model (AIC: -513.008) was found least compared to the GLGR model (AIC: -488.279), indicating that the generalized beta regression model is better than the gamma regression model. Hence, the results of the GLBR model have been extracted for this study and prepared the results accordingly. The software Statistical Package for Social Science (SPSS) v25 and R version 4.1.2 was used to conduct the statistical analysis.

### Ethical approval

This study was approved by Noakhali Science and Technology University Ethical Committee (NSTUEC), and the ethical approval number of this study is NSTU/SCI/EC/2022/125. Written consent was taken from the autism school authorities. As the study did not involve any medical or surgical procedure experimented on humans, verbal consent was obtained from the parents (either fathers or mothers) of ASD children. The study was conducted following the Declaration of Helsinki. Participants were ensured the confidentiality of their identity and given data. The nature of the study was completely voluntary, and no incentives were given for participation.

### Results

[Fig 1](#) illustrates the frequency of the indicators of ASD considered in this study. The figure shows the percentage of mildly abnormal children in imitation was 49.8% ( $n = 201$ ), 45.5% in emotional response ( $n = 184$ ), 35.9% in verbal communication ( $n = 145$ ), and 46.5% in general impression ( $n = 188$ ). Again in the case of "level and consistency of intellectual response" and "fear and nervousness," the percentage of moderately abnormal children was 41.1% ( $n = 166$ ), and 37.1% ( $n = 150$ ), respectively.

Moreover, the number of mildly abnormal and moderately abnormal children was the same in activity level ( $n = 155$ , 38.4%). Furthermore, [Fig 1](#) shows that almost the same number of children behave within normal limits in visual ( $n = 200$ , 49.5%) and listening responses ( $n = 201$ , 49.8%).

### Characteristics of socioeconomic and demographic features

General frequency distribution tables have been prepared to understand the characteristics of this study's explanatory variables and are presented in [Tables 2](#) and [3](#). Maximum children included in this study aged between 5 and 10 ( $n = 170$ , 42.1%) followed by the age group 11–15 years ( $n = 144$ , 35.6%) ([Table 2](#)). The table showed that 54.7% of the child ( $n = 221$ ) were male, and 45.3% ( $n = 183$ ) were female ([Table 2](#)). The maximum autistic child has a birth weight of over 2.5 kg ( $n = 312$ , 77.2%). [Table 2](#) revealed that 63.4% of ASD children were first-born ( $n = 256$ ), and 64.9% ( $n = 262$ ) had no birth asphyxia. [Table 3](#) showed that 73.8% ( $n = 298$ ) of fathers' age at the time of birth of ASD-affected children was less than 40 years. The study found that 74.5% ( $n = 301$ ) of mothers aged 21 to 35 and 73.5% ( $n = 297$ ) of families with autistic children belong to middle socioeconomic status. In the case of Fathers' education level, it is observed that only 3.5% ( $n = 14$ ) possess less than a secondary level, 44.6% ( $n = 180$ ) possess graduates, and 20.3% ( $n = 82$ ) of them possess higher education.

Table 2. Neonatal characteristics of children with autism spectrum disorder.

| Variables       | Categories     | Frequency | Percent |
|-----------------|----------------|-----------|---------|
| Gender          | Female         | 183       | 45.3    |
|                 | Male           | 221       | 54.7    |
| Age             | 2–4 Years      | 32        | 7.9     |
|                 | 5–10 Years     | 170       | 42.1    |
|                 | 11–15 Years    | 144       | 35.6    |
|                 | 16–18 Years    | 58        | 14.4    |
| Birth weight    | < 2.5kg        | 92        | 22.8    |
|                 | ≥ 2.5 kg       | 312       | 77.2    |
| Birth order     | Firstborns     | 256       | 63.4    |
|                 | Later born     | 148       | 36.6    |
| Premature birth | No             | 254       | 62.9    |
|                 | Yes            | 150       | 37.1    |
| Birth asphyxia  | No             | 262       | 64.9    |
|                 | Yes            | 142       | 35.1    |
| Breastfeeding   | < 6 months     | 19        | 4.7     |
|                 | 6 to 12 months | 101       | 25      |
|                 | > 12 months    | 284       | 70.3    |

<https://doi.org/10.1371/journal.pone.0289220.t002>

Table 3 revealed that 65.3% (n = 264) of the mothers were homemakers, and only 3% (n = 12) were government job holders. A considerable number of autistic children (n = 313, 77.5%) belong to the nuclear family, while only 22.5% (n = 91) child belongs to the joint family. The result showed that 86.9% (n = 351) of the mother was not threatened with abortion, and 63.1% (n = 255) had no maternal history of drug use during pregnancy. In addition, Table 3 revealed that 28.2% (n = 114) had poor nutrition during pregnancy, and 73% (n = 295) of the child were born by cesarean delivery.

### Bivariate analysis of the significant mean difference

Tables 4 and 5 represent the results of bivariate analysis exploring the association or significant mean rank or median difference of ASD scores among different categories of the explanatory variables. The Mann-Whitney U test in Table 4 showed no significant difference in the median score of CARSc between boys and girls (Mann-Whitney U = 19238,  $p > 0.05$ ), and birth weight (Mann-Whitney U = 13378.5,  $p > 0.05$ ). However, birth asphyxia was found to be significant with ASD (Mann-Whitney U = 16307,  $p < 0.05$ ).

From Table 4, it is also observed that psychological stress (Mann-Whitney U = 12779,  $p < 0.05$ ) and a history of specific drug use during pregnancy (Mann-Whitney U = 14412,  $p < 0.05$ ) were significant with ASD. The father's age at birth of the child was found to be significant with ASD (Mann-Whitney U = 13687,  $p < 0.05$ ), and the highest mean ASD score was observed in the children whose father's age was less than 40 at the time of birth ( $0.379 \pm 0.132$ ). A significant difference is found between the autistic children whose mothers are threatened (and not threatened) to abortion after 20 weeks of pregnancy (Mann-Whitney U = 7216,  $p < 0.05$ ). Moreover, the table showed that poor nutrition during pregnancy (Mann-Whitney U = 14021.5,  $p < 0.05$ ), vitamin D deficit (Mann-Whitney U = 13076.5,  $p < 0.05$ ), and mineral deficiencies (Mann-Whitney U = 13704.5,  $p < 0.05$ ) were also significant with the score of ASD. Mothers with a history of drug use during pregnancy have a greater mean CARSc score ( $0.406 \pm 0.132$ ).



Table 3. Parental socioeconomic and demographic characteristics of autism spectrum disorder.

| Variables                                              | Categories                | Frequency | Percent |
|--------------------------------------------------------|---------------------------|-----------|---------|
| Fathers' age at the time of birth                      | <40 years                 | 298       | 73.8    |
|                                                        | ≥40 years                 | 106       | 26.2    |
| Mothers' age at the time of birth                      | <21 years                 | 86        | 21.3    |
|                                                        | 21–35 years               | 301       | 74.5    |
|                                                        | >35 years                 | 17        | 4.2     |
| Socio economic status                                  | Low                       | 25        | 6.2     |
|                                                        | Middle                    | 297       | 73.5    |
|                                                        | Higher                    | 82        | 20.3    |
| Father's education level                               | Less than secondary level | 14        | 3.5     |
|                                                        | Secondary level           | 32        | 7.9     |
|                                                        | Higher secondary level    | 96        | 23.8    |
|                                                        | Graduate                  | 180       | 44.6    |
|                                                        | Higher education          | 82        | 20.3    |
| Mother's education level                               | Less than secondary level | 65        | 16.1    |
|                                                        | Secondary level           | 68        | 16.8    |
|                                                        | Higher secondary level    | 138       | 34.2    |
|                                                        | Graduate                  | 101       | 25      |
|                                                        | Higher education          | 32        | 7.9     |
| Father's occupation                                    | Not Employed              | 3         | 0.7     |
|                                                        | Private service           | 140       | 34.7    |
|                                                        | Government service        | 97        | 24      |
|                                                        | Teacher                   | 17        | 4.2     |
|                                                        | Others                    | 147       | 36.4    |
| Mother's occupation                                    | Housewife                 | 264       | 65.3    |
|                                                        | Private service           | 62        | 15.3    |
|                                                        | Government service        | 12        | 3       |
|                                                        | Teacher                   | 34        | 8.4     |
|                                                        | Others                    | 32        | 7.9     |
| Family types                                           | Nuclear family            | 313       | 77.5    |
|                                                        | Joint family              | 91        | 22.5    |
| Family history of autism disorder                      | No family history of ASD  | 257       | 63.6    |
|                                                        | Family history of ASD     | 84        | 20.8    |
|                                                        | Sibling history of ASD    | 63        | 15.6    |
| Father illness                                         | No                        | 264       | 65.3    |
|                                                        | Diabetics                 | 45        | 11.1    |
|                                                        | Others                    | 95        | 23.5    |
| Consanguinity                                          | Not related               | 286       | 70.8    |
|                                                        | First-degree relative     | 118       | 29.2    |
| Threatened abortion 20 weeks                           | No                        | 351       | 86.9    |
|                                                        | Yes                       | 53        | 13.1    |
| Specific illness during pregnancy                      | No                        | 225       | 55.7    |
|                                                        | Diabetics                 | 42        | 10.4    |
|                                                        | Thyroid                   | 24        | 5.9     |
|                                                        | Others                    | 85        | 21      |
| Psychological stress of mother during pregnancy        | No                        | 115       | 28.5    |
|                                                        | Yes                       | 289       | 71.5    |
| Maternal history of specific drug use during pregnancy | No                        | 255       | 63.1    |

(Continued)

Table 3. (Continued)

| Variables                       | Categories       | Frequency | Percent |
|---------------------------------|------------------|-----------|---------|
| Poor nutrition during pregnancy | Yes              | 149       | 36.9    |
|                                 | No               | 290       | 71.8    |
| Vitamin D deficit               | Yes              | 114       | 28.2    |
|                                 | No               | 294       | 72.8    |
| Mineral deficiencies            | Yes              | 110       | 27.2    |
|                                 | No               | 286       | 70.8    |
| Type of delivery                | Yes              | 118       | 29.2    |
|                                 | Vaginal delivery | 109       | 27      |
|                                 | Cesarean section | 295       | 73      |

<https://doi.org/10.1371/journal.pone.0289220.t003>

Table 4. Mann-Whitney U test of significant mean difference of CARSc between the categories of binary explanatory variables.

| Variables                                              | Categories            | Mann-Whitney U test |                |         |         |                |         |
|--------------------------------------------------------|-----------------------|---------------------|----------------|---------|---------|----------------|---------|
|                                                        |                       | Mean                | Std. Deviation | Minimum | Maximum | Test statistic | p-value |
| Gender                                                 | Female                | 0.377               | 0.131          | 0.100   | 0.770   | 19238          | 0.398   |
|                                                        | Male                  | 0.367               | 0.135          | 0.030   | 0.700   |                |         |
| Birth weight                                           | < 2.5kg               | 0.390               | 0.153          | 0.130   | 0.730   | 13378.5        | 0.321   |
|                                                        | ≥ 2.5 kg              | 0.366               | 0.126          | 0.030   | 0.770   |                |         |
| Birth order                                            | Firstborns            | 0.362               | 0.134          | 0.030   | 0.730   | 17045          | 0.092   |
|                                                        | Later born            | 0.387               | 0.130          | 0.100   | 0.770   |                |         |
| Premature birth                                        | No                    | 0.372               | 0.137          | 0.100   | 0.770   | 18901          | 0.895   |
|                                                        | Yes                   | 0.370               | 0.127          | 0.030   | 0.730   |                |         |
| Birth asphyxia                                         | No                    | 0.361               | 0.134          | 0.100   | 0.730   | 16307          | 0.04    |
|                                                        | Yes                   | 0.390               | 0.129          | 0.030   | 0.770   |                |         |
| Fathers' age at the time of birth                      | < 40 years            | 0.379               | 0.132          | 0.100   | 0.770   | 13687          | 0.041   |
|                                                        | ≥ 40 years            | 0.348               | 0.133          | 0.030   | 0.700   |                |         |
| Family types                                           | Nuclear family        | 0.370               | 0.137          | 0.030   | 0.770   | 13641.5        | 0.539   |
|                                                        | Joint family          | 0.377               | 0.118          | 0.130   | 0.670   |                |         |
| Consanguinity                                          | Not related           | 0.369               | 0.138          | 0.030   | 0.770   | 16019.5        | 0.422   |
|                                                        | First-degree relative | 0.376               | 0.121          | 0.100   | 0.730   |                |         |
| Threatened abortion during pregnancy                   | No                    | 0.364               | 0.132          | 0.030   | 0.770   | 7216           | 0.008   |
|                                                        | Yes                   | 0.420               | 0.133          | 0.130   | 0.730   |                |         |
| Psychological stress during pregnancy                  | No                    | 0.334               | 0.118          | 0.130   | 0.630   | 12779          | 0.000   |
|                                                        | Yes                   | 0.386               | 0.136          | 0.030   | 0.770   |                |         |
| Maternal history of specific drug use during pregnancy | No                    | 0.351               | 0.129          | 0.100   | 0.730   | 14412          | 0.000   |
|                                                        | Yes                   | 0.406               | 0.132          | 0.030   | 0.770   |                |         |
| Poor nutrition during pregnancy                        | No                    | 0.361               | 0.132          | 0.030   | 0.730   | 14021.5        | 0.017   |
|                                                        | Yes                   | 0.397               | 0.133          | 0.130   | 0.770   |                |         |
| Vitamin D deficit                                      | No                    | 0.358               | 0.128          | 0.030   | 0.730   | 13075.5        | 0.003   |
|                                                        | Yes                   | 0.406               | 0.140          | 0.130   | 0.770   |                |         |
| Mineral deficiencies                                   | No                    | 0.357               | 0.126          | 0.030   | 0.700   | 13704.5        | 0.003   |
|                                                        | Yes                   | 0.406               | 0.143          | 0.130   | 0.770   |                |         |
| Type of delivery                                       | Vaginal delivery      | 0.375               | 0.140          | 0.100   | 0.730   | 15990          | 0.933   |
|                                                        | Cesarean section      | 0.370               | 0.130          | 0.030   | 0.770   |                |         |

<https://doi.org/10.1371/journal.pone.0289220.t004>

In addition to the Mann-Whitney U test, the Kruskal-Wallis H test for testing the significant mean rank difference of CARSc has been calculated and presented in Table 5. Moreover, the results showed a significant mean rank difference in ASD scores was found in different illnesses (Kruskal-Wallis H = 26.145,  $p < 0.05$ ) during pregnancy. Other variables like parents' education, occupation, mother's age, and breastfeeding were not significant with CARSc.

**Table 5. Kruskal-Wallis H test of significant mean difference of CARSc among the multiple categories (more than two) explanatory variables.**

| Variables                         | Categories                | Kruskal-Wallis H test |                |         |         |                |         |
|-----------------------------------|---------------------------|-----------------------|----------------|---------|---------|----------------|---------|
|                                   |                           | Mean                  | Std. Deviation | Minimum | Maximum | Test statistic | p-value |
| Breastfeeding                     | < 6 months                | 0.342                 | 0.178          | 0.030   | 0.700   |                |         |
|                                   | 6 to 12 months            | 0.370                 | 0.128          | 0.100   | 0.730   | 1.172          | 0.557   |
|                                   | > 12 months               | 0.374                 | 0.132          | 0.100   | 0.770   |                |         |
| Mothers age at the time of birth  | < 21 years                | 0.367                 | 0.142          | 0.130   | 0.730   |                |         |
|                                   | 21–35 years               | 0.372                 | 0.129          | 0.030   | 0.770   | 0.777          | 0.678   |
|                                   | >35 years                 | 0.377                 | 0.158          | 0.170   | 0.700   |                |         |
| Socio economic status             | Low                       | 0.355                 | 0.167          | 0.170   | 0.730   |                |         |
|                                   | Middle                    | 0.365                 | 0.130          | 0.030   | 0.770   | 5.32           | 0.07    |
|                                   | Higher                    | 0.399                 | 0.131          | 0.100   | 0.700   |                |         |
| Fathers education                 | Less than secondary level | 0.371                 | 0.200          | 0.100   | 0.730   |                |         |
|                                   | Secondary level           | 0.395                 | 0.137          | 0.130   | 0.630   | 4.637          | 0.327   |
|                                   | Higher secondary level    | 0.373                 | 0.142          | 0.130   | 0.700   |                |         |
|                                   | Graduate                  | 0.377                 | 0.114          | 0.100   | 0.730   |                |         |
|                                   | Higher education          | 0.347                 | 0.145          | 0.030   | 0.770   |                |         |
| Mothers education                 | Less than secondary level | 0.370                 | 0.171          | 0.100   | 0.730   |                |         |
|                                   | Secondary level           | 0.373                 | 0.116          | 0.130   | 0.630   | 4.355          | 0.36    |
|                                   | Higher secondary level    | 0.380                 | 0.109          | 0.100   | 0.670   |                |         |
|                                   | Graduate                  | 0.368                 | 0.128          | 0.100   | 0.730   |                |         |
|                                   | Higher education          | 0.339                 | 0.184          | 0.030   | 0.770   |                |         |
| Fathers occupation                | Not Employed              | 0.422                 | 0.201          | 0.230   | 0.630   |                |         |
|                                   | Private service           | 0.357                 | 0.146          | 0.030   | 0.770   | 7.128          | 0.129   |
|                                   | Government service        | 0.358                 | 0.117          | 0.100   | 0.730   |                |         |
|                                   | Teacher                   | 0.349                 | 0.087          | 0.200   | 0.500   |                |         |
|                                   | Others                    | 0.394                 | 0.131          | 0.100   | 0.730   |                |         |
| Mothers occupation                | Housewife                 | 0.367                 | 0.143          | 0.030   | 0.770   |                |         |
|                                   | Private service           | 0.381                 | 0.112          | 0.130   | 0.670   | 3.092          | 0.543   |
|                                   | Government service        | 0.347                 | 0.111          | 0.170   | 0.530   |                |         |
|                                   | Teacher                   | 0.364                 | 0.119          | 0.100   | 0.600   |                |         |
|                                   | Others                    | 0.399                 | 0.110          | 0.200   | 0.670   |                |         |
| Family history of autism disorder | No family history of ASD  | 0.372                 | 0.138          | 0.100   | 0.730   |                |         |
|                                   | Family history of ASD     | 0.362                 | 0.123          | 0.030   | 0.670   | 0.205          | 0.903   |
|                                   | Sibling history of ASD    | 0.382                 | 0.126          | 0.100   | 0.770   |                |         |
| Father illness                    | No                        | 0.363                 | 0.137          | 0.030   | 0.770   |                |         |
|                                   | Diabetics                 | 0.371                 | 0.129          | 0.130   | 0.700   | 3.810          | 0.149   |
|                                   | Others-thyroiditis        | 0.393                 | 0.122          | 0.030   | 0.770   |                |         |
| Specific illness during pregnancy | No                        | 0.347                 | 0.125          | 0.100   | 0.700   |                |         |
|                                   | Diabetics                 | 0.365                 | 0.119          | 0.170   | 0.630   | 26.145         | 0.000   |
|                                   | Thyroid                   | 0.457                 | 0.154          | 0.170   | 0.770   |                |         |
|                                   | Others (Hypertension)     | 0.388                 | 0.132          | 0.030   | 0.730   |                |         |

<https://doi.org/10.1371/journal.pone.0289220.t005>

**Table 6. Impact of neonatal, parental socioeconomic, and demographic factors on autism spectrum disorder (Generalized Linear Beta Regression Model).**

| Variables                                                    | Estimates | St. Error | Z-value | Odds Ratio | 95% CI of Odds |       | p-value |
|--------------------------------------------------------------|-----------|-----------|---------|------------|----------------|-------|---------|
|                                                              |           |           |         |            | Lower          | Upper |         |
| Intercept                                                    | -0.750    | 0.140     | -5.37   | 0.472      | 0.359          | 0.621 | 0.000   |
| Birth Weight ( $\geq 2.5$ kg)                                | -0.109    | 0.066     | -1.66   | 0.896      | 0.788          | 1.020 | 0.096   |
| Birth Order (Later born)                                     | 0.124     | 0.056     | 2.213   | 1.132      | 1.014          | 1.264 | 0.027   |
| Premature Birth (Yes)                                        | -0.136    | 0.070     | -1.95   | 0.873      | 0.761          | 1.001 | 0.051   |
| Birth Asphyxia (Yes)                                         | 0.040     | 0.073     | 0.546   | 1.040      | 0.902          | 1.200 | 0.585   |
| Father's age at the time of Birth ( $\geq 40$ years)         | -0.149    | 0.064     | -2.32   | 0.862      | 0.760          | 0.977 | 0.020   |
| Socioeconomic status (Middle)                                | 0.083     | 0.121     | 0.681   | 1.086      | 0.856          | 1.378 | 0.496   |
| Socioeconomic status (Higher)                                | 0.252     | 0.133     | 1.900   | 1.286      | 0.992          | 1.668 | 0.057   |
| Threatened to abortion (Yes)                                 | 0.117     | 0.086     | 1.370   | 1.124      | 0.951          | 1.329 | 0.171   |
| Specific illness during pregnancy (Diabetics)                | 0.009     | 0.093     | 0.101   | 1.010      | 0.841          | 1.212 | 0.919   |
| Specific illness during pregnancy (Thyroiditis)              | 0.117     | 0.078     | 1.502   | 1.124      | 0.965          | 1.310 | 0.133   |
| Specific illness during pregnancy (Others- Hypertension,)    | 0.292     | 0.094     | 3.109   | 1.339      | 1.114          | 1.609 | 0.002   |
| Psychological stress during pregnancy (Yes)                  | 0.086     | 0.066     | 1.306   | 1.090      | 0.958          | 1.240 | 0.192   |
| Maternal history of specific drug use during pregnancy (Yes) | 0.093     | 0.068     | 1.365   | 1.098      | 0.960          | 1.256 | 0.172   |
| Poor nutrition during pregnancy (Yes)                        | -0.079    | 0.117     | -0.672  | 0.924      | 0.735          | 1.163 | 0.502   |
| Vitamin D deficit (Yes)                                      | 0.157     | 0.130     | 1.204   | 1.170      | 0.906          | 1.509 | 0.228   |
| Mineral deficiency (Yes)                                     | 0.078     | 0.093     | 0.834   | 1.081      | 0.900          | 1.298 | 0.404   |

<https://doi.org/10.1371/journal.pone.0289220.t006>

## Impact of neonatal, parental socioeconomic, and demographic factors on ASD

Table 6 represents the impact of socioeconomic and demographic factors on ASD. Birth order significantly impacts ASD (OR: 1.142,  $p < 0.05$ ). Babies born in the second and later order are 1.142 times more at risk of having ASD compared to the baby born in 1<sup>st</sup> order. Premature birth also impacted ASD (OR: 0.872,  $p = 0.05$ ) significantly. This study found that babies with premature birth have less risk of ASD compared to those children who were not at premature birth.

The odds ratio and p-value in Table 6 revealed that fathers aged greater than 40 years had less risk of having a baby with ASD. Moreover, the odds ratio of socioeconomic status (higher class) is 1.323, and the p-value is 0.057, indicating socioeconomic status has no significant impact on ASD. It is observed from the results that the wealthiest respondents have an increased risk of having a child with ASD. The people who are of higher class are 1.323 times more prone to have autistic children than those with low socioeconomic status. Furthermore, maternal history of specific illness during pregnancy significantly impacts ASD (OR: 1.033,  $p < 0.05$ ). Mothers with a history of specific diseases during pregnancy are 1.339 times more at risk of having an autistic child than their mothers who do not have such illness during pregnancy.

## Discussion

The study focused on the effect of socioeconomic, demographic, nutritional, parental, and birth-related factors on the occurrence of autism spectrum disorder among children in Bangladesh. The results revealed that the birth order significantly impacts ASD, and later-born children had a significantly higher risk of having ASD than the first baby. A previous study identifying the effect of birth order and birth interval on ASD found a substantial correlation between ASD and birth order [30]. Another study conducted in California on sibling birth showed that ASD prevalence in second-born children was higher than in firstborn children,

especially when they were born within 24 months [31]. The literature revealed that birth order was significantly associated with ASD phenotype, and with the increase in birth order, mental retardation, intelligence score, and adaptive functioning decreased [32, 33]. Another research conducted in West Bengal, India, found that children with high birth order have a severe phenotype of autism, while the child born in first order has less phenotype of ASD [34].

In addition, the study showed the association of paternal age with the risk for ASD. A study in New York City conducted by Quinlan and colleagues (2015) [35] found a significant association between paternal age and ASD, and the risk of ASD increased with the increase in paternal and maternal age [35, 36]. Research on the population of Thailand also found a role of advanced paternal age (age >35 years) and unemployed mothers in ASD [37]. In contrast, an investigation on 132,271 individuals conducted in Israel showed that advancing paternal age had a significant monotonic association with the risk of ASD. Idring S. et al. surveyed 417 303 Swedish children born between 1984–2003 and elucidated that older-aged fathers have a greater risk of having a child with ASD [38]. In line with the results of this study, another study found a significant association between paternal age and a greater risk of ASD in their offspring [39].

This investigation observed that parents' socioeconomic status had no substantial impact on ASD. Similarly, a European study found no statistically significant relationship between the family's income status and the formation of ASD in children [31]. A study examining the association between maternal education and ASD in Finland elucidated that socioeconomic status was not substantially associated with children's autism disorder [40]. The finding of this study is consistent with the result of an investigation that the parental wealth index has no significant association with children's ASD [41]. In contrast, a significant effect of the family's socioeconomic level on ASD was observed in previous literature from the United States of America (USA) [42]. Another study also revealed that with the variation in socioeconomic status, the level of ASD also varied significantly [43].

The bivariate analysis showed that maternal drug exposure (Antidepressant drugs and Opioids) during pregnancy substantially impacts ASD. The mean score of ASD was observed to be high among mothers who used the specific drug during pregnancy. A population-based cohort study during 2001–11 in Stockholm County, Sweden, reported the potential impact of the use of different medications on the outcomes of ASD, particularly antidepressant drugs [44] and serotonin reuptake inhibitors [45]. Moreover, Wood AG, et., al, (2015) demonstrated that using folic acid supplements and marijuana in the first trimester of pregnancy increased childhood autism [46]. In contrast to the result of this study, an investigation observed contradictory results and showed no association between maternal drug exposure and childhood ASD [47].

The study found the psychological stress of mothers during pregnancy is a risk factor for ASD in children. The impact of psychological stress on a mother during pregnancy and the child's early stage is also stated in a study conducted by TB Franklin and colleagues [48]. A review of environmental risk factors on ASD by L Liu, et., at, (2016) revealed that the period of 21–32 weeks of gestation is critical for the brain development of infants, and therefore stresses in this period could increase the risk of ASD [49]. On the other hand, a study in Thailand found a relationship between psychological disorders from the paternal side of the child's family and ASD [37]. The Mann-Whitney U test revealed that poor nutrition and vitamin D deficit during pregnancy were significant for the development of ASD in children. In Perth, Western Australia, 743 Caucasian women were observed for vitamin concentration showed similar results and proved that vitamin D deficiency in the mother during pregnancy leads to the development of ASD in the newborn baby [50]. Vitamin D deficits cause speech and language problems and attention disorders in the offspring [51] and increase the risk of ASD [52].

Moreover, this study revealed that maternal history of specific illnesses during pregnancy significantly impacts ASD. Hypertension and other related diseases during pregnancy, and delivery play an important role in ASD among their offspring [53]. A survey of 15,462 children in the United Kingdom showed that reported maternal infections are significantly associated with ASD. Another investigation found that hypertension during pregnancy was significantly associated with offspring ASD [54]. An analysis of the impact of the mother eating disorder on ASD in Sweden determined that the maternal eating disorder is significantly associated with ASD in their offspring [55].

The study did not include a control group of children to measure the contribution of each risk factor for the development of ASD, which was a limitation of the study. In addition, the study had questions about the health status of parents and children during pregnancy and birth of the child, and the response could arise recall bias. Moreover, lack of randomization during the selection of schools and children may create recruitment bias and confounding. The scarcity of previous literature in the study area also limits the logical justification of the study findings. On the other hand, the study's strength was the significant amount of data collected from ASD children from different cities in Bangladesh. Moreover, the use of CARSc to identify the risk factors of ASD is novel in Bangladesh. However, the study recommends that future investigations should focus on case-control analysis and the effect of environmental variables on ASD.

## Conclusion

Autism spectrum disorder is neglected, with insufficient epidemiological evidence for the higher incidence in Bangladesh. This cross-sectional study investigates the potential causes of ASD among children in Bangladesh. Results revealed that the birth order of the children significantly impacted ASD, and children with second and later birth order possess a higher risk of having ASD compared to the first birth. In addition, the Father's age at birth of the child and the maternal history of specific illnesses during pregnancy posed a greater risk of having a child with ASD. The study provides baseline information for the scientific community to conduct further comprehensive analytical studies in a region with limited resources.

## Supporting information

**S1 Appendix. Per school breakdown or details of the selected autism schools.**

(DOCX)

**S2 Appendix. The literature reviewed for the construction of the questionnaire.**

(DOCX)

**S3 Appendix. Assessment of socioeconomic status.**

(DOCX)

**S4 Appendix. Items modified and added in the CARSc from CARS, and calculation of CARSc.**

(DOCX)

## Acknowledgments

We are grateful to the parents of the children for their consent and participation in this study.

## Author Contributions

**Conceptualization:** Mohammad Omar Faruk, Md. Sahidur Rahman.

**Data curation:** Mohammad Omar Faruk, Md. Shohel Rana, Mahmuda Al-Neyma, Md. Sazzadul Karim, Nazia Alam.

**Formal analysis:** Mohammad Omar Faruk.

**Methodology:** Mohammad Omar Faruk.

**Software:** Mohammad Omar Faruk.

**Supervision:** Mohammad Omar Faruk.

**Writing – original draft:** Mohammad Omar Faruk, Md. Shohel Rana, Shohel Mahmud, Mahmuda Al-Neyma, Md. Sazzadul Karim, Nazia Alam.

**Writing – review & editing:** Mohammad Omar Faruk, Md. Sahidur Rahman, Md. Shohel Rana, Shohel Mahmud, Mahmuda Al-Neyma.

## References

1. NIMH» Autism Spectrum Disorder. [cited 19 Feb 2023]. Available: <https://www.nimh.nih.gov/health/topics/autism-spectrum-disorders-asd>
2. Medical Conditions Associated with Autism. In: Autism Speaks [Internet]. [cited 19 Feb 2023]. Available: <https://www.autismspeaks.org/medical-conditions-associated-autism>
3. Omar KS, Mondal P, Khan NS, Rizvi MRK, Islam MN. A machine learning approach to predict autism spectrum disorder. 2019 International conference on electrical, computer and communication engineering (ECCE). IEEE; 2019. pp. 1–6.
4. Peck FC, Gabard-Durnam LJ, Wilkinson CL, Bosl W, Tager-Flusberg H, Nelson CA. Prediction of autism spectrum disorder diagnosis using nonlinear measures of language-related EEG at 6 and 12 months. *J Neurodev Disord*. 2021; 13: 57. <https://doi.org/10.1186/s11689-021-09405-x> PMID: 34847887
5. Elsabbagh M. Linking risk factors and outcomes in autism spectrum disorder: is there evidence for resilience? *BMJ*. 2020; 368: i6880. <https://doi.org/10.1136/bmj.i6880> PMID: 31992555
6. Maenner MJ. Prevalence and Characteristics of Autism Spectrum Disorder Among Children Aged 8 Years—Autism and Developmental Disabilities Monitoring Network, 11 Sites, United States, 2018. *MMWR Surveill Summ*. 2021;70. <https://doi.org/10.15585/mmwr.ss7011a1> PMID: 34855725
7. Autism. 2022 [cited 18 Sep 2022]. Available: <https://www.who.int/news-room/fact-sheets/detail/autism-spectrum-disorders>
8. Chiarotti F, Venerosi A. Epidemiology of Autism Spectrum Disorders: A Review of Worldwide Prevalence Estimates Since 2014. *Brain Sci*. 2020; 10: 274. <https://doi.org/10.3390/brainsci10050274> PMID: 32370097
9. Fombonne E. Epidemiological controversies in autism. *Swiss Arch Neurol Psychiatry Psychother*. 2020 [cited 18 Sep 2022]. <https://doi.org/10.4414/sanp.2020.03084>
10. Akhter S, Hussain AHME, Shefa J, Kundu GK, Rahman F, Biswas A. Prevalence of Autism Spectrum Disorder (ASD) among the children aged 18–36 months in a rural community of Bangladesh: A cross sectional study. *F1000Research*. 2018; 7: 424. <https://doi.org/10.12688/f1000research.13563.1> PMID: 30026928
11. Hasan MS. Autism spectrum disorder and its care in Bangladesh. In: The Daily Star [Internet]. 26 Jan 2020 [cited 17 Feb 2023]. Available: <https://www.thedailystar.net/health/news/autism-spectrum-disorder-and-its-care-bangladesh-1859095>
12. Naheed A, Islam MdS, Hossain SW, Ahmed HU, Uddin MMJ, Tofail F, et al. Burden of major depressive disorder and quality of life among mothers of children with autism spectrum disorder in urban bangladesh. *Autism Res*. 2020; 13: 284–297. <https://doi.org/10.1002/aur.2227> PMID: 31647184
13. Nik Adib NA, Ibrahim MI, Ab Rahman A, Bakar RS, Yahaya NA, Hussin S, et al. Perceived Stress among Caregivers of Children with Autism Spectrum Disorder: A State-Wide Study. *Int J Environ Res Public Health*. 2019; 16: 1468. <https://doi.org/10.3390/ijerph16081468> PMID: 31027225

14. Lyall K, Schmidt RJ, Hertz-Picciotto I. Maternal lifestyle and environmental risk factors for autism spectrum disorders. *Int J Epidemiol*. 2014; 43: 443–464. <https://doi.org/10.1093/ije/dyt282> PMID: 24518932
15. Scotland PH. Impact of child poverty. [cited 7 Jun 2023]. Available: <http://www.healthscotland.scot/population-groups/children/child-poverty/child-poverty-overview/impact-of-child-poverty>
16. Al-Mamari W, Idris AB, Al-Zadjali AA, Jalees S, Murthi S, Al-Jabri M, et al. Parental Age and the Risk of Autism Spectrum Disorder in Oman. *Sultan Qaboos Univ Med J*. 2021; 21: 465–471. <https://doi.org/10.18295/squmj.4.2021.024> PMID: 34522414
17. Mamidala MP, Polinedi A, P T V PK, Rajesh N, Vallamkonda OR, Udani V, et al. Prenatal, perinatal and neonatal risk factors of Autism Spectrum Disorder: a comprehensive epidemiological assessment from India. *Res Dev Disabil*. 2013; 34: 3004–3013. <https://doi.org/10.1016/j.ridd.2013.06.019> PMID: 23816633
18. Sm FF, Rahman MM, Akhter S, Fatema K, Mannan M. Perinatal and Socio-Economic Risk Factors of Autism in Children attending a Tertiary Care Hospital in Bangladesh. *Glob J Intellect Dev Disabil*. 2019; 6: 1–8. <https://doi.org/10.19080/GJIDD.2019.01.555677>
19. Bangladesh Population 2023 (Live). [cited 9 Mar 2023]. Available: <https://worldpopulationreview.com/countries/bangladesh-population>
20. Schopler E, Reichler RJ, DeVellis RF, Daly K. Toward objective classification of childhood autism: Childhood Autism Rating Scale (CARS). *J Autism Dev Disord*. 1980; 10: 91–103. <https://doi.org/10.1007/BF02408436> PMID: 6927682
21. Moulton E, Bradbury K, Barton M, Fein D. Factor Analysis of the Childhood Autism Rating Scale in a Sample of Two Year Olds with an Autism Spectrum Disorder. *J Autism Dev Disord*. 2019; 49: 2733–2746. <https://doi.org/10.1007/s10803-016-2936-9> PMID: 27743321
22. Yousef AM, Roshdy EH, Abdel Fattah NR, Said RM, Atia MM, Hafez EM, et al. Prevalence and risk factors of autism spectrum disorders in preschool children in Sharkia, Egypt: a community-based study. *Middle East Curr Psychiatry*. 2021; 28: 36. <https://doi.org/10.1186/s43045-021-00114-8>
23. Non-parental caregivers, low maternal education, gastrointestinal problems and high blood lead level: predictors related to the severity of autism spectrum disorder in Northeast China | *BMC Pediatrics | Full Text*. [cited 1 May 2023]. Available: <https://bmcpediatr.biomedcentral.com/articles/10.1186/s12887-021-03086-0>
24. Zhang Q, Li Q, Yang T, Chen L, Dai Y, Wei H, et al. Neurodevelopmental domain characteristics and their association with core symptoms in preschoolers with autism spectrum disorder in China: a nationwide multicenter study. *BMC Psychiatry*. 2022; 22: 393. <https://doi.org/10.1186/s12888-022-04028-5> PMID: 35698058
25. Chlebowski C, Green JA, Barton ML, Fein D. Using the Childhood Autism Rating Scale to Diagnose Autism Spectrum Disorders. *J Autism Dev Disord*. 2010; 40: 787–799. <https://doi.org/10.1007/s10803-009-0926-x> PMID: 20054630
26. Geetha B, Sukumar C, Dhivyadeepa E, Reddy JK, Balachandrar V. Autism in India: a case-control study to understand the association between socio-economic and environmental risk factors. *Acta Neurol Belg*. 2019; 119: 393–401. <https://doi.org/10.1007/s13760-018-01057-4> PMID: 30554347
27. Dalyanto A, Sajidan, Siswandari, Sukarmin. Developing instrument to measure entrepreneur skills of vocational school students based on sustainable development. 2021; 1842: 012025. <https://doi.org/10.1088/1742-6596/1842/1/012025>
28. Cochran WG. Sampling techniques. 3d ed. New York: Wiley; 1977.
29. : AUTISTIC CHILDREN'S WELFARE FOUNDATION, BANGLADESH:: [cited 8 Jun 2023]. Available: [http://www.acwf-bd.org/frequency\\_autism.php](http://www.acwf-bd.org/frequency_autism.php)
30. Martin LA, Horriat NL. The Effects of Birth Order and Birth Interval on the Phenotypic Expression of Autism Spectrum Disorder. *PLOS ONE*. 2012; 7: e51049. <https://doi.org/10.1371/journal.pone.0051049> PMID: 23226454
31. Cheslack-Postava K, Liu K, Bearman PS. Closely Spaced Pregnancies Are Associated With Increased Odds of Autism in California Sibling Births. *Pediatrics*. 2011; 127: 246–253. <https://doi.org/10.1542/peds.2010-2371> PMID: 21220394
32. Alvares GA, Licari MK, Stevenson PG, Bebbington K, Cooper MN, Glasson EJ, et al. Investigating associations between birth order and autism diagnostic phenotypes. *J Child Psychol Psychiatry*. 2021; 62: 961–970. <https://doi.org/10.1111/jcpp.13349> PMID: 33164221
33. Orozco T. IMPACT OF BIRTH ORDER ON AUTISM SPECTRUM DISORDER CHILDREN'S TYPICALLY-DEVELOPING SIBLINGS. *Electron Theses Proj Diss*. 2014. Available: <https://scholarworks.lib.csusb.edu/etd/116>
34. Banerjee N, Adak P. Birth related parameters are important contributors in autism spectrum disorders. *Sci Rep*. 2022; 12: 14277. <https://doi.org/10.1038/s41598-022-18628-4> PMID: 35996009



35. Quinlan CA, McVeigh KH, Driver CR, Govind P, Karpati A. Parental Age and Autism Spectrum Disorders Among New York City Children 0–36 Months of Age. *Matern Child Health J*. 2015; 19: 1783–1790. <https://doi.org/10.1007/s10995-015-1692-3> PMID: 25776271
36. Kong A, Frigge ML, Masson G, Besenbacher S, Sulem P, Magnusson G, et al. Rate of de novo mutations and the importance of father's age to disease risk. *Nature*. 2012; 488: 471–475. <https://doi.org/10.1038/nature11396> PMID: 22914163
37. Khaiman C, Onnuam K, Photchanakaew S, Chonchaiya W, Suphapeetiporn K. Risk factors for autism spectrum disorder in the Thai population. *Eur J Pediatr* 2015 174(10). 2015; 174: 1365–1372. <https://doi.org/10.1007/s00431-015-2544-2> PMID: 26226890
38. Idring S, Magnusson C, Lundberg M, Ek M, Rai D, Svensson AC, et al. Parental age and the risk of autism spectrum disorders: findings from a Swedish population-based cohort. *Int J Epidemiol*. 2014; 43: 107–115. <https://doi.org/10.1093/ije/dyt262> PMID: 24408971
39. Parner ET, Baron-Cohen S, Lauritsen MB, Jørgensen M, Schieve LA, Yeargin-Allsopp M, et al. Parental Age and Autism Spectrum Disorders. *Ann Epidemiol*. 2012; 22: 143–150. <https://doi.org/10.1016/j.annepidem.2011.12.006> PMID: 22277122
40. Lehti V, Hinkka-Yli-Salomäki S, Cheslack-Postava K, Gissler M, Brown AS, Sourander A. Maternal socio-economic status based on occupation and autism spectrum disorders: a national case-control study. *Nord J Psychiatry*. 2015; 69: 523–530. <https://doi.org/10.3109/08039488.2015.1011692> PMID: 25732938
41. Larsson HJ, Eaton WW, Madsen KM, Vestergaard M, Olesen AV, Agerbo E, et al. Risk factors for autism: perinatal factors, parental psychiatric history, and socioeconomic status. *Am J Epidemiol*. 2005; 161: 916–925; discussion 926–928. <https://doi.org/10.1093/aje/kwi123> PMID: 15870155
42. Thomas P, Zahorodny W, Peng B, Kim S, Jani N, Halperin W, et al. The association of autism diagnosis with socioeconomic status. *Autism Int J Res Pract*. 2012; 16: 201–213. <https://doi.org/10.1177/1362361311413397> PMID: 21810908
43. Adak B, Halder S. Systematic Review on Prevalence for Autism Spectrum Disorder with Respect to Gender and Socio-Economic Status. *J Ment Disord Treat*. 2017;03. <https://doi.org/10.4172/2471-271X.1000133>
44. Rai D, Lee BK, Dalman C, Newschaffer C, Lewis G, Magnusson C. Antidepressants during pregnancy and autism in offspring: population based cohort study. *The BMJ*. 2017; 358: j2811. <https://doi.org/10.1136/bmj.j2811> PMID: 28724519
45. Boukhris T, Sheehy O, Mottron L, Bérard A. Antidepressant Use During Pregnancy and the Risk of Autism Spectrum Disorder in Children. *JAMA Pediatr*. 2016; 170: 117. <https://doi.org/10.1001/jamapediatrics.2015.3356> PMID: 26660917
46. Wood AG, Nadebaum C, Anderson V, Reutens D, Barton S, O'Brien TJ, et al. Prospective assessment of autism traits in children exposed to antiepileptic drugs during pregnancy. *Epilepsia*. 2015; 56: 1047–1055. <https://doi.org/10.1111/epi.13007> PMID: 25963613
47. Wang Z, Chan AYL, Coghill D, Ip P, Lau WCY, Simonoff E, et al. Association Between Prenatal Exposure to Antipsychotics and Attention-Deficit/Hyperactivity Disorder, Autism Spectrum Disorder, Preterm Birth, and Small for Gestational Age. *JAMA Intern Med*. 2021; 181: 1332–1340. <https://doi.org/10.1001/jamainternmed.2021.4571> PMID: 34398171
48. Franklin TB, Russig H, Weiss IC, Grff J, Linder N, Michalon A, et al. Epigenetic transmission of the impact of early stress across generations. *Biol Psychiatry*. 2010; 68: 408–415. <https://doi.org/10.1016/j.biopsych.2010.05.036> PMID: 20673872
49. Liu L, Zhang D, Rodzinka-pasko JK, Li YM. Environmental risk factors for autism spectrum disorders. *Nervenarzt*. 2016; 87: 55–61. <https://doi.org/10.1007/S00115-016-0172-3> PMID: 27531204
50. Whitehouse AJO, Holt BJ, Serralha M, Holt PG, Kusel MMH, Hart PH. Maternal serum vitamin D levels during pregnancy and offspring neurocognitive development. *Pediatrics*. 2012; 129: 485–493. <https://doi.org/10.1542/peds.2011-2644> PMID: 22331333
51. Siniscalco D, Cirillo A, Bradstreet JJ, Antonucci N. Epigenetic Findings in Autism: New Perspectives for Therapy. *Int J Environ Res Public Health*. 2013; 10: 4261. <https://doi.org/10.3390/ijerph10094261> PMID: 24030655
52. Yasuda H, Kobayashi M, Yasuda Y, Tsutsui T. Estimation of autistic children by metallomics analysis. *Sci Rep* 2013 3(1). 2013; 3: 1–8. <https://doi.org/10.1038/srep01199> PMID: 23383369
53. Faruk MO, Sultana S, Al-Neyma M, Hossain S. Socioeconomic, demographic, and nutritional factors associated with cesarean deliveries among childbearing women in Bangladesh. *J Med Surg Public Health*. 2023; 1: 100001. <https://doi.org/10.1016/j.glmedi.2023.100001>

54. Brand JS, Lawlor DA, Larsson H, Montgomery S. Association Between Hypertensive Disorders of Pregnancy and Neurodevelopmental Outcomes Among Offspring. *JAMA Pediatr.* 2021; 175: 577–585. <https://doi.org/10.1001/jamapediatrics.2020.6856> PMID: 33749704
55. Mantel Å, Örtqvist AK, Hirschberg AL, Stephansson O. Analysis of Neurodevelopmental Disorders in Offspring of Mothers With Eating Disorders in Sweden. *JAMA Netw Open.* 2022; 5: e2143947. <https://doi.org/10.1001/jamanetworkopen.2021.43947> PMID: 35040968
